# Supplementary material for: Perspectives on the Plastic Surgery Common Application (PSCA): A Survey of 2021–2022 Integrated Plastic Surgery Applicants
Source: PubMed Central journal article supplement — Plast Reconstr Surg Glob Open. 2023 Jan 13;11(1):e4766. doi: 10.1097/GOX.0000000000004766 (PMC9839255; doi:10.1097/gox.0000000000004766), 2023-01-13
Supplement: gox-11-e4766-s002.pdf [file gox-11-e4766-s002.pdf]

|       |       |          |             |
|-------|-------|----------|-------------|
| Dates | Title | Category | Description |
| Dates | Title | Category | Description |
| Dates | Title | Category | Description |

**Honors and Awards (Limit 10)**

|      |             |                        |                   |
|------|-------------|------------------------|-------------------|
| Year | Award Title | Affiliated Institution | Award Description |
| Year | Award Title | Affiliated Institution | Award Description |
| Year | Award Title | Affiliated Institution | Award Description |

**Research Projects (No Limit)**

|      |                                                                                                                                                                                                                                                                                                                      |
|------|----------------------------------------------------------------------------------------------------------------------------------------------------------------------------------------------------------------------------------------------------------------------------------------------------------------------|
| Year | Project Title:<br>Research Mentor:<br>Status of manuscript: Published, In-Press, Accepted, Submitted, In Progress<br>Abstract, Oral, or Poster Presentations: (Poster or oral presentation) at<br>(conference or meeting #1 on mm/dd/yy), (Poster or oral presentation) at<br>(conference or meeting #2 on mm/dd/yy) |
|------|----------------------------------------------------------------------------------------------------------------------------------------------------------------------------------------------------------------------------------------------------------------------------------------------------------------------|

**Hobbies**

\*\*\*
